# Supplementary material for: Two ligand-length-tunable interpenetrating coordination networks with stable Zn2 unit as three-connected uninode and supramolecular topologies
Source: Royal Society of Chemistry journal article supplement (doi:10.1039/c3ce40117k), 2013-01-01
Supplement: c3ce40117k.pdf [file c3ce40117k.pdf]

## Electronic Supplementary Information for:

# Two Ligand-Length-Tunable Interpenetrating Coordination Networks with Stable $Zn_2$ Unit as Three-connected Uninode and Supramolecular Topologies

Guohai Xu,<sup>\*,a</sup> Jianyi Lv,<sup>a</sup> Peng Guo,<sup>b</sup> Zhonggao Zhou,<sup>a</sup> Ziyi Du<sup>a</sup> and Yongrong Xie<sup>\*,a</sup>

<sup>a</sup>Key Laboratory of Jiangxi University for Functional Materials Chemistry, School of Chemistry and Chemical Engineering, Gannan Normal University, Ganzhou, Jiangxi 341000, People's Republic of China

<sup>b</sup>Inorganic and Structural Chemistry and Berzelii Center EXSELENT on Porous Materials, Department of Materials and Environmental Chemistry, Stockholm University, SE-106 91 Stockholm, Sweden

E-mail: xugh308@gmail.com;yongrongxie@yahoo.com.cn

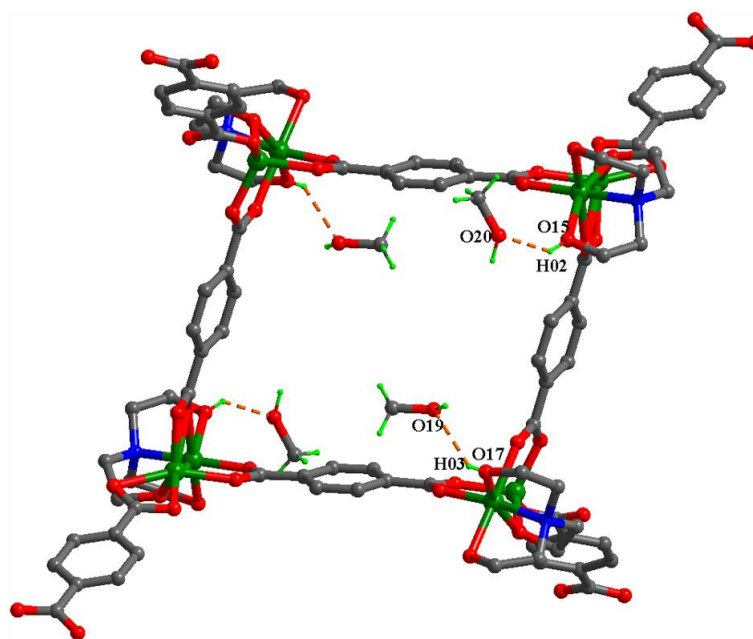

Figure S1. A cavity of the square 4-ring window trapping four methanol molecules through hydrogen bonds compound **1**.

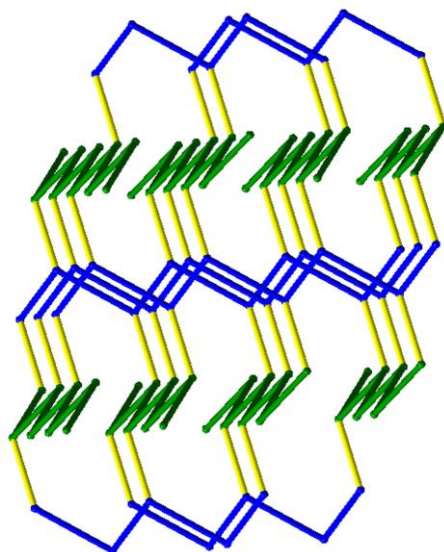

Figure S2. A discrete  $10^3$ -ths net showing that zigzag chains (green and blue) are crosslinked at  $55.2^\circ$  to each other in compound 2.

Powder X-ray diffraction data were collected using a Bruker D8 Advance (Cu  $K\alpha$ 1 radiation,  $\lambda=1.5406 \text{ \AA}$ ).

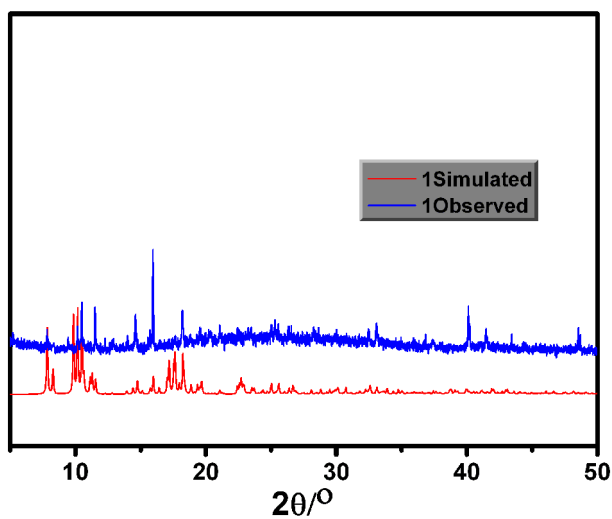

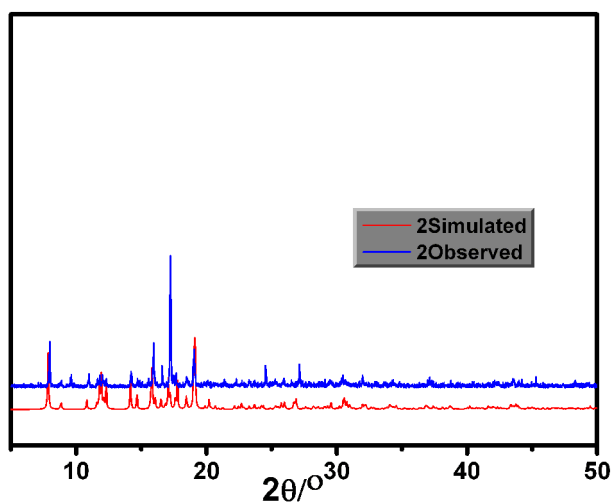

Figure S3. Calculated and observed powder X-ray diffraction patterns of 1-2.

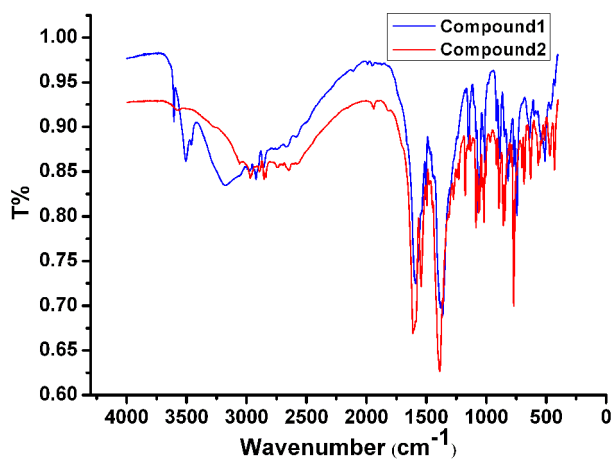

Figure S4. The infrared spectra of 1 and 2.

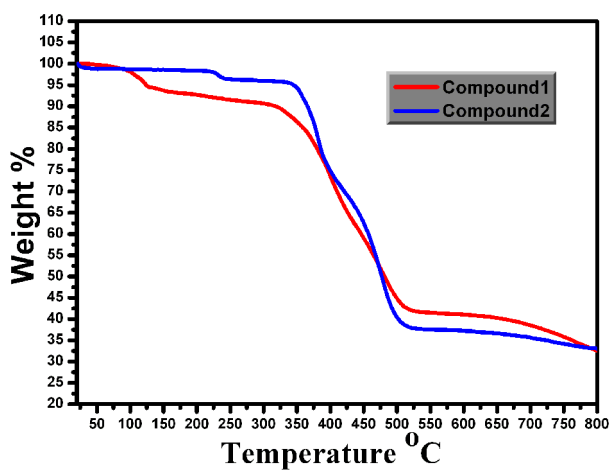

Figure S5. Thermogravimetric analyses of samples 1 and 2.

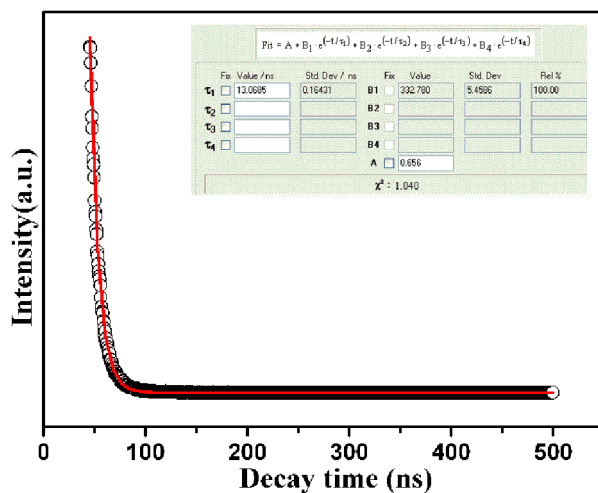

a

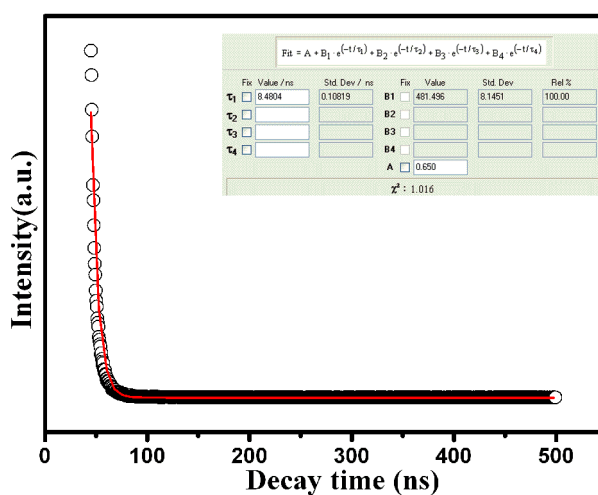

b

Figure S6. Fitted decay curves for **1** (a) and **2** (b) in the solid state at room temperature (the black circles represent experimental data, and the solid red lines represent fitting results).

### Topological Analysis for **1** by TOPOS program

#####

1: C<sub>38</sub>H<sub>48</sub>N<sub>2</sub>O<sub>40</sub>Zn<sub>4</sub>

#####

Atom coordinates (C = the centriods of bdc<sup>2-</sup> ligands, Zn1/Zn2 = the centriods of Zn<sub>2</sub> cluster)

Topology for Zn1

-----

Atom Zn1 links by bridge ligands and has

| Common vertex with |         |         |        |          | R(A-A)  | f |
|--------------------|---------|---------|--------|----------|---------|---|
| Zn 2               | 0.3091  | -0.4357 | 0.5682 | ( 0-1 0) | 10.642A | 1 |
| Zn 2               | 0.6909  | 0.4357  | 1.4318 | ( 1 1 2) | 10.714A | 1 |
| Zn 1               | -1.0127 | -0.2634 | 1.0778 | (-1 0 2) | 13.623A | 1 |

Topology for Zn2

-----  
Atom Zn2 links by bridge ligands and has

| Common vertex with |         |         |        |          | R(A-A)  | f |
|--------------------|---------|---------|--------|----------|---------|---|
| Zn 1               | 0.0127  | 1.2634  | 0.9222 | ( 0 1 0) | 10.642A | 1 |
| Zn 1               | 0.9873  | 0.7366  | 1.0778 | ( 1 1 2) | 10.714A | 1 |
| Zn 2               | -0.3091 | -0.5643 | 0.4318 | ( 0 0 1) | 13.331A | 1 |

-----  
Structural group analysis

-----  
Structural group No 1

-----  
Structure consists of layers ( 0 1-2) with Zn2C3

Coordination sequences

-----  
Zn1: 1 2 3 4 5 6 7 8 9 10  
Num 3 5 8 11 13 16 19 21 24 27  
Cum 4 9 17 28 41 57 76 97 121 148  
Rad 11.7(1.7) 18.3(2.7) 25.4(3.3) 32.2(3.5) 39.9(4.7) 48.2(4.8) 55.3(4.9) 62.8(5.9) 71.2(6.4)  
78.8(6.4)  
Cmp Zn3 Zn5 Zn8 Zn11 Zn13 Zn16 Zn19 Zn21 Zn24 Zn27

-----  
Zn2: 1 2 3 4 5 6 7 8 9 10  
Num 3 5 8 11 13 16 19 21 24 27  
Cum 4 9 17 28 41 57 76 97 121 148  
Rad 11.6(1.5) 18.9(1.5) 25.2(3.1) 31.9(4.3) 40.4(4.4) 48.1(4.2) 55.0(5.7) 63.3(6.0) 71.2(5.6)  
78.4(7.0)  
Cmp Zn3 Zn5 Zn8 Zn11 Zn13 Zn16 Zn19 Zn21 Zn24 Zn27

-----  
TD10=148

Vertex symbols for selected sublattice

-----  
Zn1 Point symbol:{4.8^2}  
Extended point symbol:[4.8.8]

-----  
Zn2 Point symbol:{4.8^2}

Extended point symbol:[4.8.8]

-----  
Point symbol for net: {4.8<sup>2</sup>}

3-c net; uninodal net

Topological type: fes; Shubnikov plane net (4.8<sup>2</sup>) (topos&RCSR.ttd) {4.8<sup>2</sup>} - VS [4.8.8]  
(72524 types in 11 databases)

Elapsed time: 14.19 sec.

### Supramolecular Topological Analysis for 1 by TOPOS program

#####

1: C<sub>38</sub>H<sub>48</sub>N<sub>2</sub>O<sub>40</sub>Zn<sub>4</sub>

#####

Atom coordinates (C = the centriods of bdc<sup>2-</sup> ligands or the midpoints of two Zn<sub>2</sub> cluster with H-bonding interactions, Zn1/Zn2 = the centriods of Zn<sub>2</sub> cluster)

Topology for Zn1

-----

Atom Zn1 links by bridge ligands and has

| Common vertex with |         |         |        | R(A-A)   | f       |   |
|--------------------|---------|---------|--------|----------|---------|---|
| Zn 1               | -0.0127 | 0.7366  | 1.0778 | ( 0 1 2) | 5.645A  | 1 |
| Zn 2               | 0.3091  | -0.4357 | 0.5682 | ( 0-1 0) | 10.642A | 1 |
| Zn 2               | 0.6909  | 0.4357  | 1.4318 | ( 1 1 2) | 10.714A | 1 |
| Zn 1               | -1.0127 | -0.2634 | 1.0778 | (-1 0 2) | 13.623A | 1 |

Topology for Zn2

-----

Atom Zn2 links by bridge ligands and has

| Common vertex with |         |         |        | R(A-A)   | f       |   |
|--------------------|---------|---------|--------|----------|---------|---|
| Zn 2               | 0.6909  | 0.4357  | 0.4318 | ( 1 1 1) | 5.698A  | 1 |
| Zn 1               | 0.0127  | 1.2634  | 0.9222 | ( 0 1 0) | 10.642A | 1 |
| Zn 1               | 0.9873  | 0.7366  | 1.0778 | ( 1 1 2) | 10.714A | 1 |
| Zn 2               | -0.3091 | -0.5643 | 0.4318 | ( 0 0 1) | 13.331A | 1 |

-----  
Structural group analysis

-----

-----  
Structural group No 1

-----

Structure consists of 3D framework with ZnC2

There are 2 interpenetrating nets

FIV: Full interpenetration vectors

-----  
[1,0,0] (11.30A)  
[0,1,0] (11.73A)  
[0,0,1] (19.51A)  
[1,1,1] (19.82A)  
[1,-1,-1] (25.54A)  
[1,-1,1] (26.76A)  
[1,1,-1] (28.67A)  
-----

PIC: [2,0,0][1,1,0][0,1,1] (PICVR=2)

Zt=2; Zn=1

Class Ia Z=2

Coordination sequences

-----  
Zn1: 1 2 3 4 5 6 7 8 9 10  
Num 4 11 24 41 62 90 122 157 200 247  
Cum 5 16 40 81 143 233 355 512 712 959  
Rad 10.2(3.3) 16.0(3.2) 21.8(4.9) 28.0(5.7) 34.3(6.8) 40.9(7.9) 47.3(8.9) 53.7(10.0) 60.4(11.1)  
67.0(12.1)  
Cmp Zn4 Zn11 Zn24 Zn41 Zn62 Zn90 Zn122 Zn157 Zn200 Zn247

-----  
Zn2: 1 2 3 4 5 6 7 8 9 10  
Num 4 11 24 41 62 90 122 157 200 247  
Cum 5 16 40 81 143 233 355 512 712 959  
Rad 10.1(3.2) 16.3(3.1) 21.7(4.8) 27.9(5.9) 34.5(6.8) 40.8(7.8) 47.2(8.9) 53.9(10.0) 60.4(11.0)  
66.8(12.2)  
Cmp Zn4 Zn11 Zn24 Zn41 Zn62 Zn90 Zn122 Zn157 Zn200 Zn247

-----  
TD10=959

Vertex symbols for selected sublattice

-----  
Zn1 Point symbol: {4.6<sup>5</sup>}  
Extended point symbol: [4.6(2).6.6.6.6]  
-----

Zn2 Point symbol: {4.6<sup>5</sup>}  
Extended point symbol: [4.6(2).6.6.6.6]  
-----

Point symbol for net: {4.6<sup>5</sup>}  
4-c net; uninodal net

Topological type: crb/BCT; 4/4/t5; sqc184 (topos&RCSR.ttd) {4.6<sup>5</sup>} - VS [4.6(2).6.6.6.6]  
(72524 types in 11 databases)

Elapsed time: 22.00 sec.

## Topological Analysis for 2 by TOPOS program

#####

2: C<sub>27</sub>H<sub>26</sub>NO<sub>9</sub>Zn<sub>2</sub>

#####

Atom coordinates (C = the centriods of bpd<sup>2-</sup> ligands, Zn1 = the centriod of Zn<sub>2</sub> cluster)

Topology for Zn1

-----

Atom Zn1 links by bridge ligands and has

| Common vertex with |        |        |         |          | R(A-A)  | f |
|--------------------|--------|--------|---------|----------|---------|---|
| Zn 1               | 0.1768 | 0.9293 | -0.1404 | ( 1 0 0) | 15.161A | 1 |
| Zn 1               | 1.1768 | 0.0707 | 1.3596  | ( 2 1 2) | 15.220A | 1 |
| Zn 1               | 1.1768 | 1.0707 | 0.3596  | ( 2 2 1) | 15.230A | 1 |

-----

Structural group analysis

-----

-----

Structural group No 1

-----

Structure consists of 3D framework with ZnC3

There are 8 interpenetrating nets

FIV: Full interpenetration vectors

-----

[1/2,1/2,0] (15.86A)

[1/2,-1/2,0] (15.86A)

-----

PIC: [4,4,0][0,1,-1][2,0,1] (PICVR=8)

Zt=8; Zn=1

Class Ia Z=8

Coordination sequences

-----

Zn1: 1 2 3 4 5 6 7 8 9 10



Num 3 6 12 24 38 56 77 102 129 160  
Cum 4 10 22 46 84 140 217 319 448 608

-----  
TD10=608

Vertex symbols for selected sublattice

-----  
Zn1 Point symbol: {10<sup>3</sup>}  
Extended point symbol: [10(2).10(4).10(4)]

-----  
Point symbol for net: {10<sup>3</sup>}  
3-c net; uninodal net

Topological type: ths ThSi2; 3/10/t4 (topos&RCSR.ttd) {10<sup>3</sup>} - VS [10(2).10(4).10(4)] (72524 types in 11 databases)  
Elapsed time: 7.62 sec.

### Supramolecular Topological Analysis for 2 by TOPOS program

#####

2: C<sub>27</sub>H<sub>26</sub>NO<sub>9</sub>Zn<sub>2</sub>

#####

Atom coordinates (C = the centriods of bpdc<sup>2-</sup> ligands or the midpoints of two Zn<sub>2</sub> cluster with H-bonding interactions, Zn1 = the centriod of Zn<sub>2</sub> cluster)

Topology for Zn1

-----  
Atom Zn1 links by bridge ligands and has

| Common vertex with |        |         |         |          | R(A-A)  | f |
|--------------------|--------|---------|---------|----------|---------|---|
| Zn 1               | 0.6965 | 0.4471  | 0.3407  | ( 1 0 1) | 6.965A  | 1 |
| Zn 1               | 0.6965 | -0.4471 | 0.8407  | ( 1-1 1) | 8.557A  | 1 |
| Zn 1               | 0.6965 | 0.5529  | 0.8407  | ( 1 0 1) | 8.557A  | 1 |
| Zn 1               | 0.1965 | 0.0529  | -0.1593 | ( 1 0 0) | 14.867A | 1 |
| Zn 1               | 1.1965 | -1.0529 | 1.3407  | ( 2-1 2) | 16.832A | 1 |
| Zn 1               | 1.1965 | -0.0529 | 0.3407  | ( 2 0 1) | 16.996A | 1 |

-----  
Structural group analysis

-----  
Structural group No 1

-----  
Structure consists of 3D framework with ZnC3

Coordination sequences

-----  
Zn1: 1 2 3 4 5 6 7 8 9 10  
Num 6 30 92 210 350 534 754 1020 1317 1660  
Cum 7 37 129 339 689 1223 1977 2997 4314 5974  
Rad 12.1(4.6) 18.8(5.7) 26.2(7.3) 35.3(7.9) 45.1(8.6) 55.6(8.6) 65.6(9.6) 76.1(10.0) 86.2(11.0)  
96.8(11.6)  
Cmp Zn6 Zn30 Zn92 Zn210 Zn350 Zn534 Zn754 Zn1020 Zn1317 Zn1660  
-----

TD10=5974

Vertex symbols for selected sublattice

-----  
Zn1 Point symbol: {6<sup>15</sup>}

Extended point symbol: [6(2).6(2).6(3).6(3).6(3).6(3).6(3).6(4).6(5).6(6).6(7).6(7).6(8).6(8).6(8)]

-----  
Point symbol for net: {6<sup>15</sup>}

6-c net; uninodal net

New topology, please, contact the authors (72524 types in 11 databases)

Elapsed time: 12.59 sec.
